# Supplementary material for: A selenium-confined porous carbon cathode from silk cocoons for Li–Se battery applications
Source: Royal Society of Chemistry journal article supplement (doi:10.1039/c5ra19000b), 2015-01-01
Supplement: c5ra19000b1.pdf [file c5ra19000b1.pdf]

## Supporting Information

### A selenium-confined porous carbon cathode from silk cocoon for Li-Se battery application

Min Jia<sup>a,b</sup>, Cuiping Mao<sup>a,b</sup>, Yubin Niu<sup>a,b</sup>, Junke Hou<sup>a,b</sup>, Sangui Liu<sup>a,b</sup>, Shujuan Bao<sup>a,b</sup>, Jian Jiang<sup>a,b</sup>, Maowen Xu<sup>a,b,\*</sup> and Zhisong Lu<sup>a,b,\*</sup>

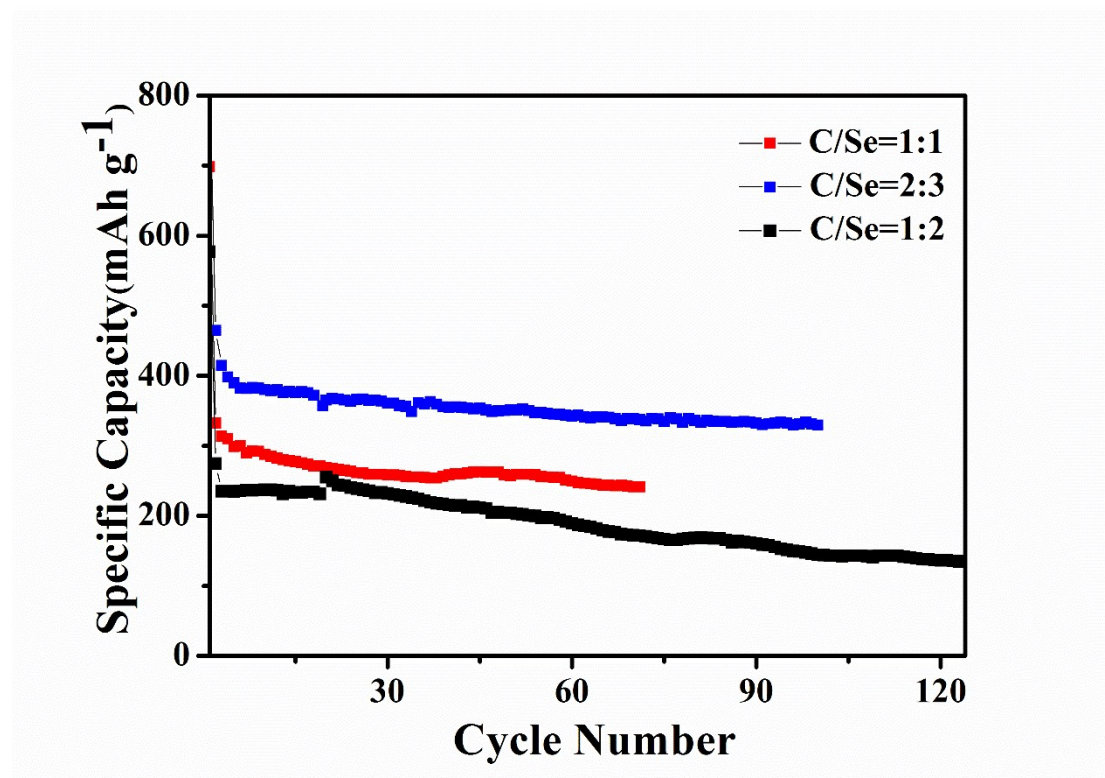

**Fig. S1.** Cycling performance of PCMs/Se composite with different C/Se mass ratios at 1C.

Cycling performance of PCMs/Se composite with different C/Se ratios is presented in Fig. S1, in which the composite cathodes with the C/Se mass ratio:  $w_C:w_{Se}=2:3$  show the best electrochemical performance

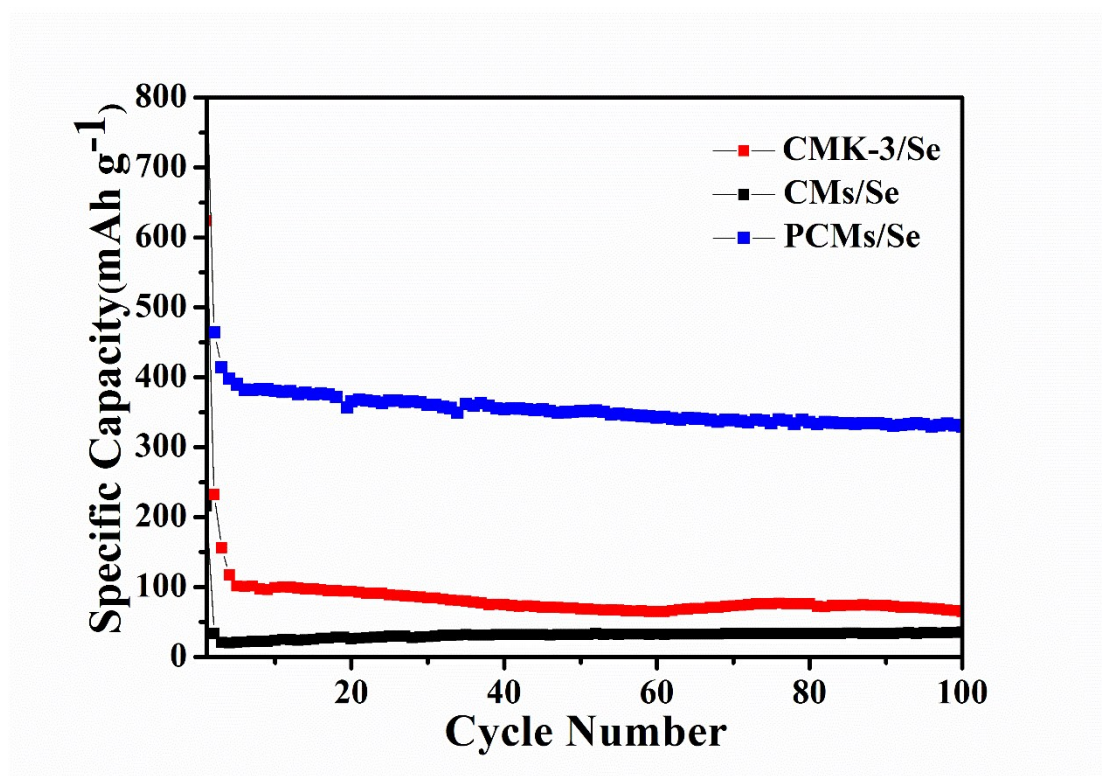

**Fig. S2.** Cycling performance of CMs/Se ( $w_C:w_{Se}=2:3$ ), PCMs/Se ( $w_C:w_{Se}=2:3$ ), CMK-3/Se ( $w_C:w_{Se}=2:3$ ) at 1C.
